# Supplementary material for: Phenolic Fractions from Dandelion Leaves and Petals as Modulators of the Antioxidant Status and Lipid Profile in an In Vivo Study
Source: PubMed Central journal article supplement (PMC7071135; doi:10.3390/antiox9020131), 2020-02-03
Supplement: antioxidants-09-00131-s001.pdf [file antioxidants-09-00131-s001.pdf]

**Table S1.** The body weight, food intake, systolic blood pressure, organ-to-body weight ratios and pH of caecum in experimental Wistar rats.

|                            | Body weight – begin of feeding (g)                   | Body weight – end of feeding (g) | Body weight gain <sup>1</sup> (g) | Daily food intake <sup>2</sup> (g) | Daily dandelion intake <sup>3</sup> (mg) | Heart rate (bpm)   | Systolic BP (mmHg)                 | Diastolic BP (mmHg) |
|----------------------------|------------------------------------------------------|----------------------------------|-----------------------------------|------------------------------------|------------------------------------------|--------------------|------------------------------------|---------------------|
| <b>Control (C)</b>         | 190 ± 2                                              | 324 ± 10                         | 134 ± 8                           | 18.0 ± 0.3                         | -                                        | 414 ± 10           | 172 ± 32                           | 87 ± 3              |
| <b>Leaf fraction (LF)</b>  | 191 (186–193)                                        | 326 (306–340)                    | 135 (120–146)                     | 18.1 (17.4– 18.6)                  | -                                        | 414 (403–423)      | 186 (121–229)                      | 90 (81–91)          |
| <b>Petal fraction (PF)</b> | 190 ± 3                                              | 308 ± 6                          | 118 ± 3                           | 16.9 ± 0.2                         | 11.7 ± 0.1                               | 383 ± 16           | 142 ± 29                           | 97 ± 7              |
| <b>Control (C)</b>         | 189 (185–197)                                        | 310 (298–317)                    | 120 (113–121)                     | 16.9 (16.6–17.2)                   | 11.7 (11.5–12.1)                         | 387 (351–410)      | 119 (104–201)                      | 91 (90–111)         |
| <b>Leaf fraction (LF)</b>  | 190 ± 2                                              | 315 ± 14                         | 124 ± 12                          | 17.3 ± 0.8                         | 12.0 ± 0.6                               | 409 ± 26           | 156 ± 36                           | 112 ± 15            |
| <b>Petal fraction (PF)</b> | 192 (187–193)                                        | 322 (287–335)                    | 130 (100–143)                     | 17.8 (15.7– 18.4)                  | 12.4 (10.9–12.8)                         | 407 (356–465)      | 120 (118–228)                      | 104 (91–142)        |
|                            | <i>p</i> -Value*                                     |                                  |                                   |                                    |                                          |                    |                                    |                     |
| <b>C vs. LF</b>            | 0.9695                                               | 0.2409                           | 0.2516                            | 0.3722                             | -                                        | 0.9916             | 0.1634                             | 0.9519              |
| <b>C vs. PF</b>            | 0.9456                                               | 0.6199                           | 0.5364                            | 0.6476                             | -                                        | 0.9916             | 0.2555                             | 0.9418              |
| <b>LF vs. PF</b>           | 0.9936                                               | 0.7073                           | 0.7495                            | 0.8343                             | 0.8113                                   | 0.9916             | 0.9963                             | 0.9519              |
|                            | <b>Organ to body weight ratio (in %)<sup>4</sup></b> |                                  |                                   |                                    | <b>Intestinal digesta (g)</b>            |                    |                                    | <b>pH</b>           |
|                            | <b>Heart</b>                                         | <b>Liver</b>                     | <b>Spleen</b>                     | <b>Brain</b>                       | <b>Filled cecum</b>                      | <b>Empty cecum</b> | <b>Part of the small intestine</b> | <b>Cecum</b>        |
| <b>Control (C)</b>         | 0.233 ± 0.007                                        | 3.93 ± 0.19                      | 0.21 ± 0.03                       | 0.56 ± 0.02                        | 2.72 ± 0.10                              | 0.71 ± 0.11        | 4.5 ± 1.5                          | 7.23 ± 0.09         |
| <b>Leaf fraction (LF)</b>  | 0.239 (0.219–0.241)                                  | 3.77 (3.70–4.31)                 | 0.27 (0.21–0.33)                  | 0.57 (0.53–0.59)                   | 2.68 (2.57–2.90)                         | 0.62 (0.57–0.93)   | 5.58 (1.63–6.34)                   | 7.20 (7.08–7.40)    |
| <b>Petal fraction (PF)</b> | 0.246 ± 0.009                                        | 3.60 ± 0.04                      | 0.28 ± 0.04                       | 0.59 ± 0.01                        | 2.49 ± 0.14                              | 0.64 ± 0.07        | 4.5 ± 1.4                          | 7.07 ± 0.05         |
| <b>Control (C)</b>         | 0.249 (0.229–0.260)                                  | 3.58 (3.56–3.68)                 | 0.29 (0.21–0.34)                  | 0.58 (0.58–0.62)                   | 2.61 (2.21–2.64)                         | 0.61 (0.54–0.77)   | 5.88 (1.60–5.97)                   | 7.04 (7.01–7.17)    |
| <b>Leaf fraction (LF)</b>  | 0.233 ± 0.003                                        | 3.94 ± 0.43                      | 0.29 ± 0.02                       | 0.59 ± 0.03                        | 2.78 ± 0.08                              | 0.55 ± 0.04        | 4.2 ± 1.2                          | 7.23 ± 0.18         |
| <b>Petal fraction (PF)</b> | 0.233 (0.227–0.238)                                  | 3.56 (3.46–4.79)                 | 0.29 (0.26–0.32)                  | 0.56 (0.55–0.66)                   | 2.74 (2.67–2.94)                         | 0.57 (0.48–0.60)   | 5.10 (1.89–5.68)                   | 7.29 (6.91–7.51)    |
|                            | <i>p</i> -Value*                                     |                                  |                                   |                                    |                                          |                    |                                    |                     |
| <b>C vs. LF</b>            | 0.3198                                               | 0.1760                           | 0.8164                            | 0.2502                             | 0.2486                                   | 0.6388             | 0.9876                             | 0.2260              |
| <b>C vs. PF</b>            | 0.9709                                               | 0.9802                           | 0.5722                            | 0.5236                             | 0.6436                                   | 0.2582             | 0.8834                             | 0.9712              |
| <b>LF vs. PF</b>           | 0.2404                                               | 0.4783                           | 0.7968                            | 0.9860                             | 0.1442                                   | 0.3194             | 0.8961                             | 0.4288              |

Values are expressed as the mean ± SEM and median (with Q1 and Q3) from  $n = 6$  rats per each group,  $*p \leq 0.05$  (two-way ANOVA with Tukey's multiple comparisons test). N varies among bioassays due to limitations on samples volume collected from animal subjects and/or data outlier detection by the Grubbs' test. Q1 and Q3 are 25<sup>th</sup> and 75<sup>th</sup> percentiles. <sup>1</sup> Calculated as: final body weight minus initial body weight. <sup>2</sup> Daily food intake per animal during 28 days of dietary supplementation. <sup>3</sup> Daily dandelion intake (DDI, mg) was calculated as: daily food intake (g) \* 694 mg/1000 g. daily HCAs intake (mg) was calculated as: DDI \* 420 mg/1000 mg for leaves and DDI \* 214 mg/1000 mg for petals; daily L-chicoric acid intake (mg) was calculated as DDI \* 350 mg/1000 mg for leaves and DDI \* 117 mg/1000 mg for petals. <sup>4</sup> The weight of the internal organs is calculated as: organ weight/final body weight (%). Bold values indicate statistically significant differences. *Abbreviations:* BP, blood pressure; LF, leaf fraction; PF, petal fraction.

**Table S2.** Blood plasma glucose and lipid profile of experimental Wistar rats.

|                                                  | Glucose (mmol/L) | Traditional lipid profile (mmol/L) |                  |                  |                  |                  |
|--------------------------------------------------|------------------|------------------------------------|------------------|------------------|------------------|------------------|
|                                                  |                  | TG                                 | TC               | HDL-C            | LDL-C            |                  |
| <b>Control (C)</b>                               | 17.6 ± 0.9       | 3.6 ± 0.5                          | 3.2 ± 0.2        | 0.48 ± 0.03      | 0.44 ± 0.02      |                  |
|                                                  | 17.1 (16.1–19.4) | 3.1 (3.0–4.6)                      | 3.4 (2.9–3.5)    | 0.50 (0.42–0.51) | 0.42 (0.42–0.47) |                  |
| <b>Leaf fraction (LF)</b>                        | 18.4 ± 0.2       | 1.6 ± 0.2                          | 2.4 ± 0.4        | 0.44 ± 0.01      | 0.39 ± 0.03      |                  |
|                                                  | 18.5 (18.1–18.7) | 1.5 (1.2–2.0)                      | 2.1 (1.9–3.1)    | 0.45 (0.41–0.46) | 0.36 (0.35–0.46) |                  |
| <b>Petal fraction (PF)</b>                       | 18.5 ± 1.3       | 2.7 ± 0.4                          | 2.9 ± 0.3        | 0.45 ± 0.05      | 0.49 ± 0.03      |                  |
|                                                  | 19.1 (16.0–20.5) | 2.7 (2.1–3.4)                      | 2.7 (2.6–3.5)    | 0.42 (0.38–0.56) | 0.48 (0.45–0.54) |                  |
| <i>p</i> -Value*                                 |                  |                                    |                  |                  |                  |                  |
| <b>C vs. LF</b>                                  | 0.8665           | <b>0.0262*</b>                     | <b>0.05*</b>     | 0.7240           | 0.5270           |                  |
| <b>C vs. PF</b>                                  | 0.8262           | 0.2634                             | 0.4481           | 0.8717           | 0.4487           |                  |
| <b>LF vs. PF</b>                                 | 0.9961           | <b>0.05*</b>                       | 0.2910           | 0.9552           | 0.1345           |                  |
| <b>Nontraditional lipid profile <sup>1</sup></b> |                  |                                    |                  |                  |                  |                  |
|                                                  | Non-HDL (mmol/L) | TC/HDL-C                           | LDL-C/HDL-C      | AI               | LCI              | AIP              |
| <b>Control (C)</b>                               | 2.8 ± 0.2        | 6.9 ± 0.7                          | 0.93 ± 0.09      | 5.9 ± 0.7        | 11 ± 3.1         | 0.87 ± 0.09      |
|                                                  | 2.9 (2.4–3.0)    | 6.9 (5.7–8.0)                      | 0.84 (0.82–1.12) | 5.9 (4.7–7.0)    | 9.0 (7.1–17.4)   | 0.79 (0.77–1.04) |
| <b>Leaf fraction (LF)</b>                        | 1.9 ± 0.4        | 5.4 ± 0.8                          | 0.89 ± 0.07      | 4.4 ± 0.8        | 4 ± 1.4          | 0.54 ± 0.07      |
|                                                  | 1.7 (1.4–2.7)    | 5.0 (4.1–7.0)                      | 0.85 (0.78–1.02) | 4.0 (3.1–6.0)    | 2.7 (1.7–6.4)    | 0.57 (0.40–0.65) |
| <b>Petal fraction (PF)</b>                       | 2.5 ± 0.3        | 6.7 ± 1.1                          | 1.11 ± 0.13      | 5.7 ± 1.1        | 10 ± 3.1         | 0.78 ± 0.10      |
|                                                  | 2.3 (2.1–3.1)    | 7.0 (4.8–8.4)                      | 1.18 (0.86–1.29) | 6.0 (3.8–7.4)    | 8.6 (4.7–15.3)   | 0.86 (0.57–0.90) |
| <i>p</i> -Value*                                 |                  |                                    |                  |                  |                  |                  |
| <b>C vs. LF</b>                                  | 0.2316           | 0.5279                             | 0.9574           | 0.5279           | <b>0.05*</b>     | <b>0.0449*</b>   |
| <b>C vs. PF</b>                                  | 0.8194           | 0.9931                             | 0.4942           | 0.9931           | 0.8840           | 0.7597           |
| <b>LF vs. PF</b>                                 | 0.4371           | 0.5846                             | 0.3735           | 0.5846           | 0.2863           | 0.2446           |

Values are expressed as the mean ± SEM and median (with Q1 and Q3) from  $n = 6$  rats per each group,  $*p \leq 0.05$  (two-way ANOVA with *Tukey's* multiple comparisons test). N varies among bioassays due to limitations on samples volume collected from animal subjects and/or data outlier detection by the Grubbs' test. Q1 and Q3 are 25<sup>th</sup> and 75<sup>th</sup> percentiles. <sup>1</sup> A nontraditional lipid profile was calculated as non-HDL-C: TC minus HDL-C; LDL-C/HDL-C; AI, non-HDL-C/HDL-C; LCI, TC\*TG\*LDL-C/HDL-C; AIP,  $\log_{10}(\text{TG}/\text{HDL-C})$ . Bold values indicate statistically significant differences. *Abbreviations:* AI, atherogenic index; AIP, atherogenic index of plasma; HDL-C, high-density lipoprotein cholesterol; LCI, lipoprotein combine index; LDL-C, low-density lipoprotein cholesterol; LF, leaf fraction; PF, petal fraction; TC, total cholesterol; TG, triglyceride.

**Table S3.** The antioxidant capacity of experimental Wistar rats.

|                     | Thiol groups<br>(nmol/mL/mg of protein) |                   | Carbonyl groups<br>(nmol/mL/mg of protein or nmol/mg homogenate) |                  |                     |                     | F2 $\alpha$ -isoprostane |
|---------------------|-----------------------------------------|-------------------|------------------------------------------------------------------|------------------|---------------------|---------------------|--------------------------|
|                     | Plasma                                  | Plasma            | Heart                                                            | Liver            | Spleen              | Brain               | Urine                    |
| Control (C)         | 60 $\pm$ 6                              | 29.2 $\pm$ 0.2    | 1.5 $\pm$ 0.3                                                    | 12.3 $\pm$ 2.5   | 36 $\pm$ 3          | 18.6 $\pm$ 2.4      | 20 $\pm$ 8               |
|                     | 55 (53–73)                              | 29.1 (29–29.6)    | 1.66 (0.99–1.9)                                                  | 11.0 (8.8–17.0)  | 37.8 (29.6–39.4)    | 21.0 (13.7–21.2)    | 14 (9.4–34.9)            |
| Leaf fraction (LF)  | 81 $\pm$ 12                             | 17.2 $\pm$ 1.8    | 1.9 $\pm$ 0.3                                                    | 19.2 $\pm$ 1.9   | 49 $\pm$ 13         | 23.1 $\pm$ 3.3      | 18 $\pm$ 9               |
|                     | 79 (62–103)                             | 15.73 (15.1–20.9) | 1.85 (1.28–2.46)                                                 | 18.6 (17.9–24.0) | 54.3 (24.6–68.7)    | 20.9 (18.9–29.5)    | 11 (7.8–36.1)            |
| Petal fraction (PF) | 96 $\pm$ 3                              | 29.0 $\pm$ 5.3    | 1.5 $\pm$ 0.1                                                    | 10.9 $\pm$ 3.6   | 31 $\pm$ 7          | 25.2 $\pm$ 3.6      | 14 $\pm$ 3               |
|                     | 97 (90–100)                             | 29.3 (19.6–38.2)  | 1.53 (1.31–1.76)                                                 | 9.6 (4.9–15.1)   | 26.0 (21.3–45.3)    | 23.3 (20.1–32.1)    | 12 (10.4–19.0)           |
| <i>p</i> -Value*    |                                         |                   |                                                                  |                  |                     |                     |                          |
| C vs. LF            | 0.2033                                  | <b>0.0214*</b>    | 0.3636                                                           | 0.0646           | 0.4055              | 0.3867              | 0.9074                   |
| C vs. PF            | <b>0.0076*</b>                          | 0.9902            | 0.9986                                                           | 0.4772           | 0.8761              | 0.1907              | 0.5025                   |
| LF vs. PF           | 0.3093                                  | <b>0.0486*</b>    | 0.3825                                                           | <b>0.0486*</b>   | 0.2424              | 0.7860              | 0.6509                   |
|                     | ORAC ( $\mu$ mol TE/L)                  |                   | TBARS (nmol/mL or nmol/mg homogenate)                            |                  |                     |                     |                          |
|                     | Plasma                                  | Plasma            | Thoracic artery                                                  | Heart            | Liver               | Spleen              | Brain                    |
| Control (C)         | 578 $\pm$ 2                             | 1.32 $\pm$ 0.02   | 0.18 $\pm$ 0.04                                                  | 0.23 $\pm$ 0.06  | 0.120 $\pm$ 0.018   | 0.408 $\pm$ 0.023   | 0.058 $\pm$ 0.006        |
|                     | 579 (574–581)                           | 1.33 (1.28–1.36)  | 0.18 (0.11–0.25)                                                 | 0.20 (0.14–0.34) | 0.122 (0.088–0.150) | 0.412 (0.365–0.446) | 0.064 (0.045–0.066)      |
| Leaf fraction (LF)  | 573 $\pm$ 13                            | 1.70 $\pm$ 0.23   | 0.13 $\pm$ 0.03                                                  | 0.14 $\pm$ 0.05  | 0.127 $\pm$ 0.007   | 0.317 $\pm$ 0.006   | 0.031 $\pm$ 0.003        |
|                     | 571 (551–596)                           | 1.76 (1.29–2.06)  | 0.13 (0.07–0.18)                                                 | 0.10 (0.09–0.24) | 0.130 (0.113–0.137) | 0.314 (0.308–0.330) | 0.028 (0.028–0.038)      |
| Petal fraction (PF) | 627 $\pm$ 24                            | 1.36 $\pm$ 0.03   | 0.10 $\pm$ 0.04                                                  | 0.15 $\pm$ 0.02  | 0.121 $\pm$ 0.012   | 0.327 $\pm$ 0.012   | 0.036 $\pm$ 0.012        |
|                     | 649 (578–653)                           | 1.35 (1.33–1.42)  | 0.08 (0.05–0.18)                                                 | 0.15 (0.11–0.19) | 0.111 (0.107–0.145) | 0.327 (0.306–0.348) | 0.043 (0.013–0.051)      |
| <i>p</i> -Value*    |                                         |                   |                                                                  |                  |                     |                     |                          |
| C vs. LF            | 0.9612                                  | 0.1706            | <b>0.05*</b>                                                     | 0.5827           | 0.7719              | <b>0.0208*</b>      | <b>0.0225*</b>           |
| C vs. PF            | 0.1183                                  | 0.9651            | <b>0.05*</b>                                                     | 0.6161           | 0.9938              | <b>0.0379*</b>      | 0.1651                   |
| LF vs. PF           | 0.0910                                  | 0.2222            | 0.7057                                                           | 0.9978           | 0.8266              | 0.5219              | 0.7370                   |

Values are expressed as the mean  $\pm$  SEM and median (with Q1 and Q3) from  $n = 6$  rats per each group,  $*p \leq 0.05$  (two-way ANOVA with *Tukey's* multiple comparisons test). N varies among bioassays due to limitations on samples volume collected from animal subjects and/or data outlier detection by the Grubbs' test. Q1 and Q3 are 25<sup>th</sup> and 75<sup>th</sup> percentiles. Bold values indicate statistically significant differences. *Abbreviations:* LF, leaf fraction; PF, petal fraction.
